# Supplementary material for: Fabrication of a bi-metallic metal organic framework nanocomposite for selective and sensitive detection of triclosan
Source: Royal Society of Chemistry journal article supplement (doi:10.1039/d3ay00033h), 2023-01-01

## Fabrication of a bi-metallic metal organic frame work nanocomposite for selective and sensitive detection of triclosan

Lokesh Kumar S,<sup>a</sup> Kishore K.R. Tetala<sup>a\*</sup>

<sup>a</sup> Centre for Bioseparation Technology, Vellore Institute of Technology, Vellore, Tamilnadu-632014, India

Fig. S1. TEM images (A) interlinked nanorods in 200 nm range (B) single nanorod structure in 100 nm

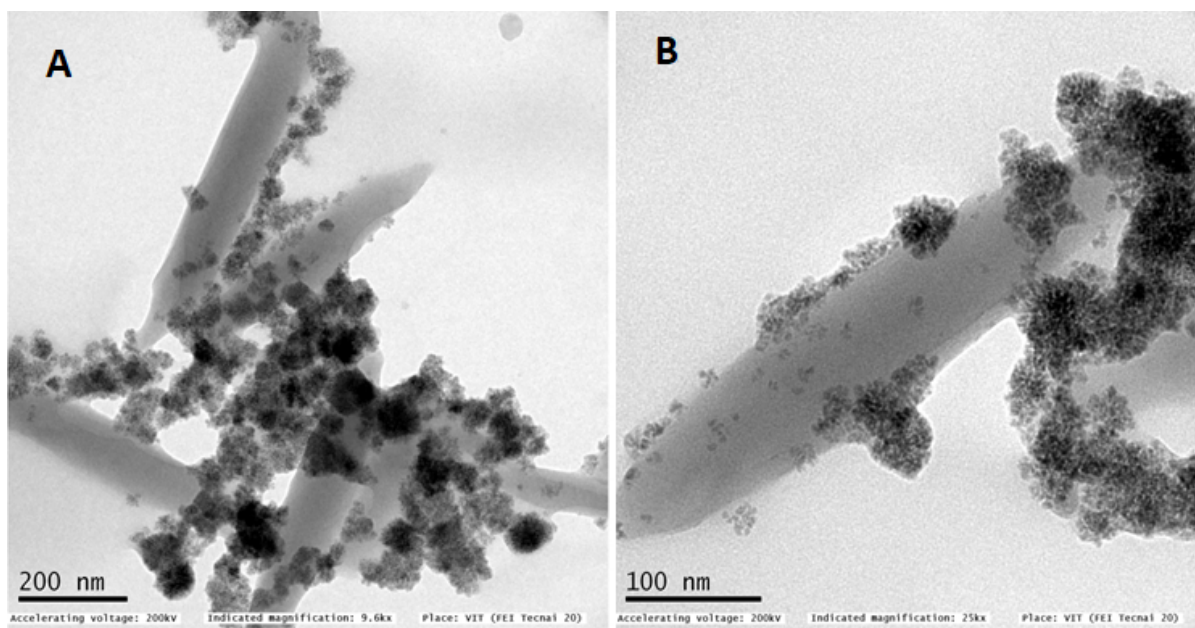

Fig S2. Scan rate effect (A) anodic and cathodic current values (B) anodic and cathodic log values

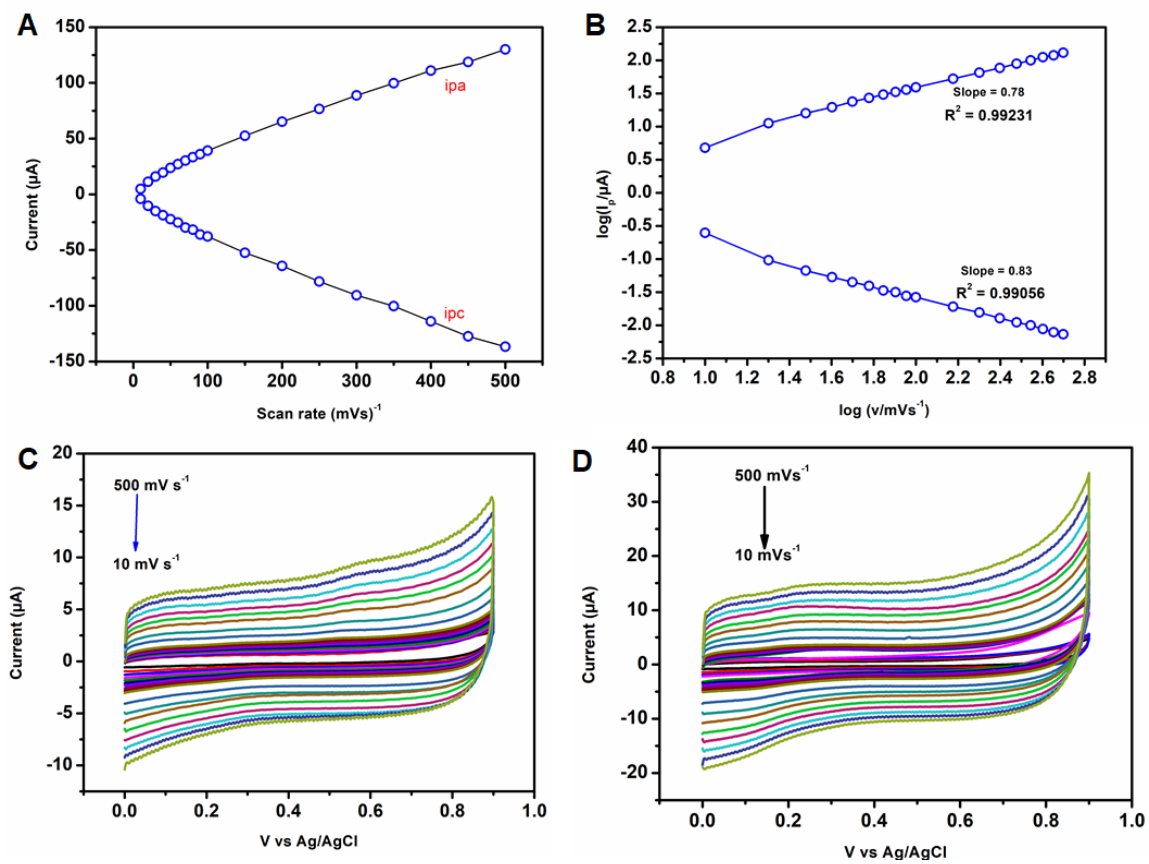

Fig S3. (A) Different electrodes on TCS (B) different pH bar with error value (C) SWV curves of TCS at low concentrations (D) SWV profile of TCS + individual interfering agents and (E) SWV plot of TCS + individual plasma interfering agents (glucose, dopamine, ascorbic acid and uric acid)

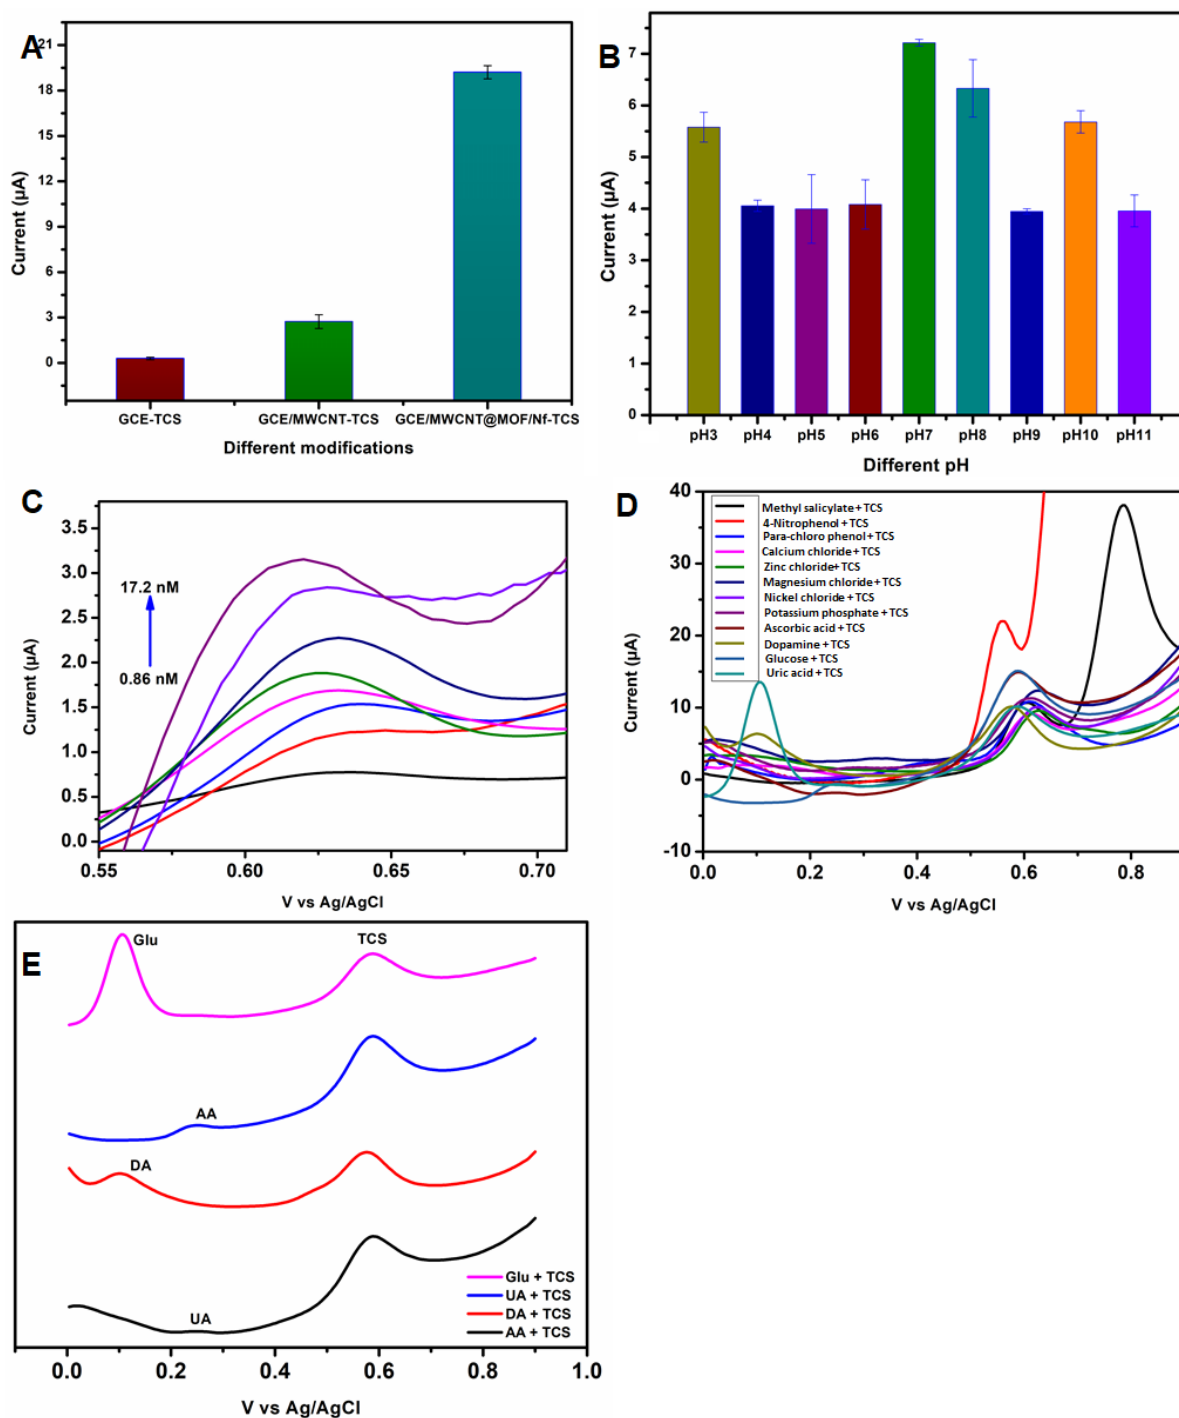

Fig S4: (A) GCE/MWCNT@MOF in different period of time (B) MOF modified electrode stability

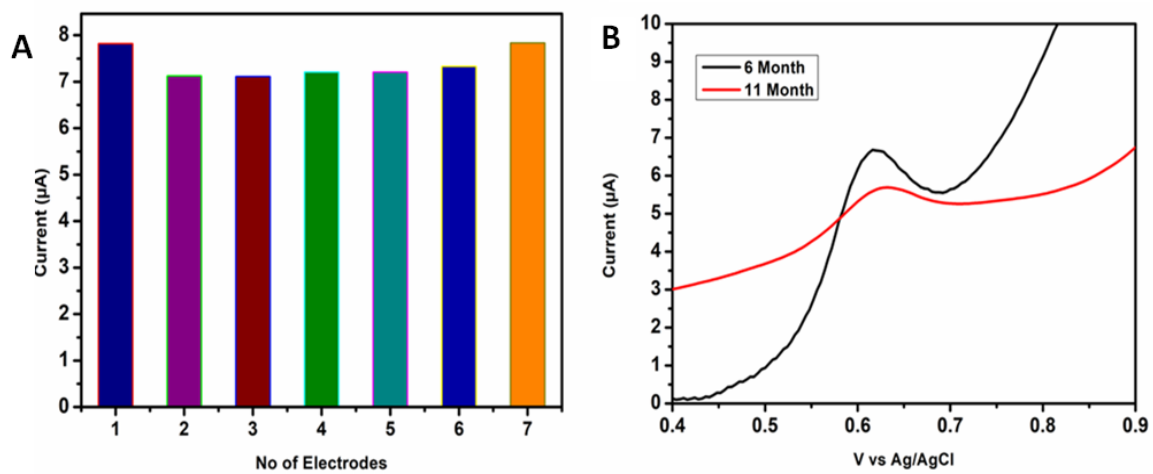

Fig S5: (A) GCE/MWCNT@MOF on real samples (B) SPCE/MWCNT@MOF on real sample

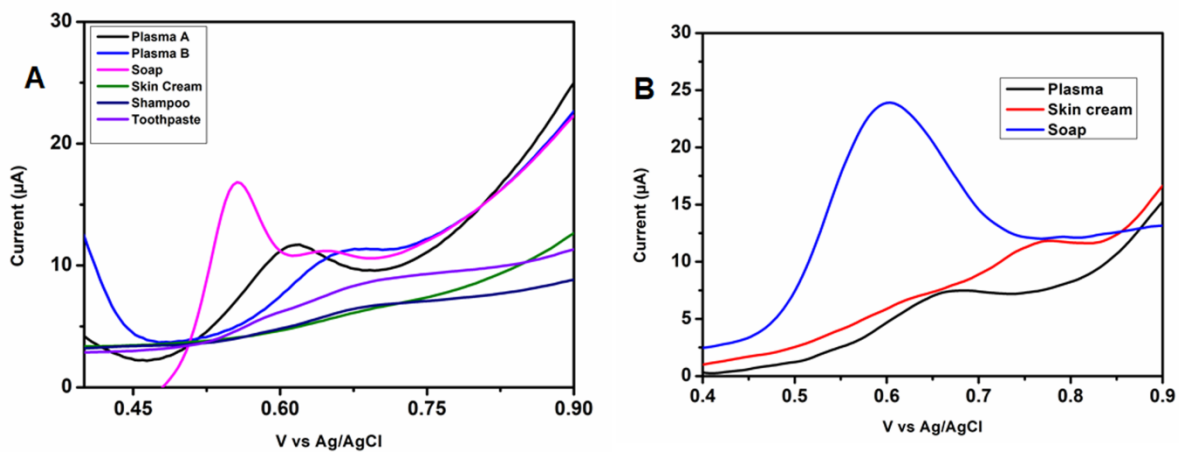

Supplement: d3ay00033h1.pdf [file d3ay00033h1.pdf]
